# Supplementary material for: A new slider turtle (Testudines: Emydidae: Deirochelyinae:Trachemys) from the late Hemphillian (late Miocene/early Pliocene) of eastern Tennessee and the evolution of the deirochelyines
Source: PeerJ journal article supplement (doi:10.7717/peerj.4338), 2018-02-13
Supplement: Supp_Figs_S73-S74_with_captions.pdf [file Supp_Figs_S73-S74_with_captions.pdf]

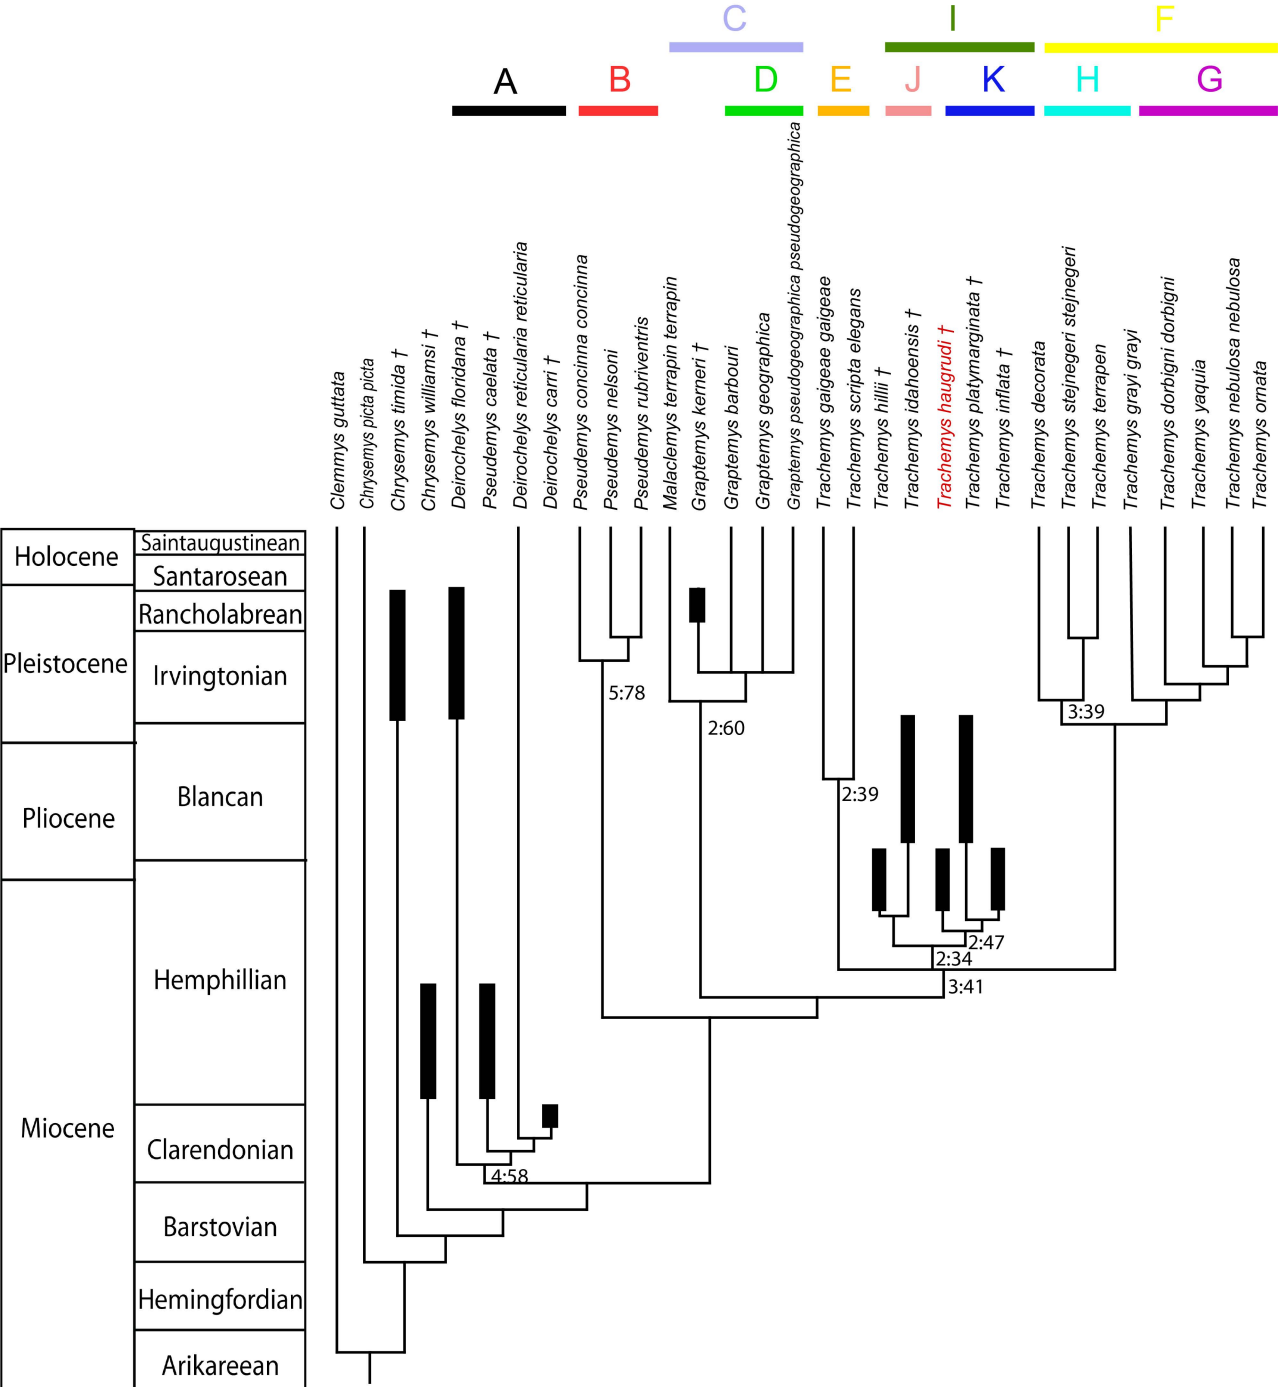

**Figure S73. 50% majority rule consensus tree of the phylogenetic relationships of deirochelyine emydids supported by this study based on morphologic data.**

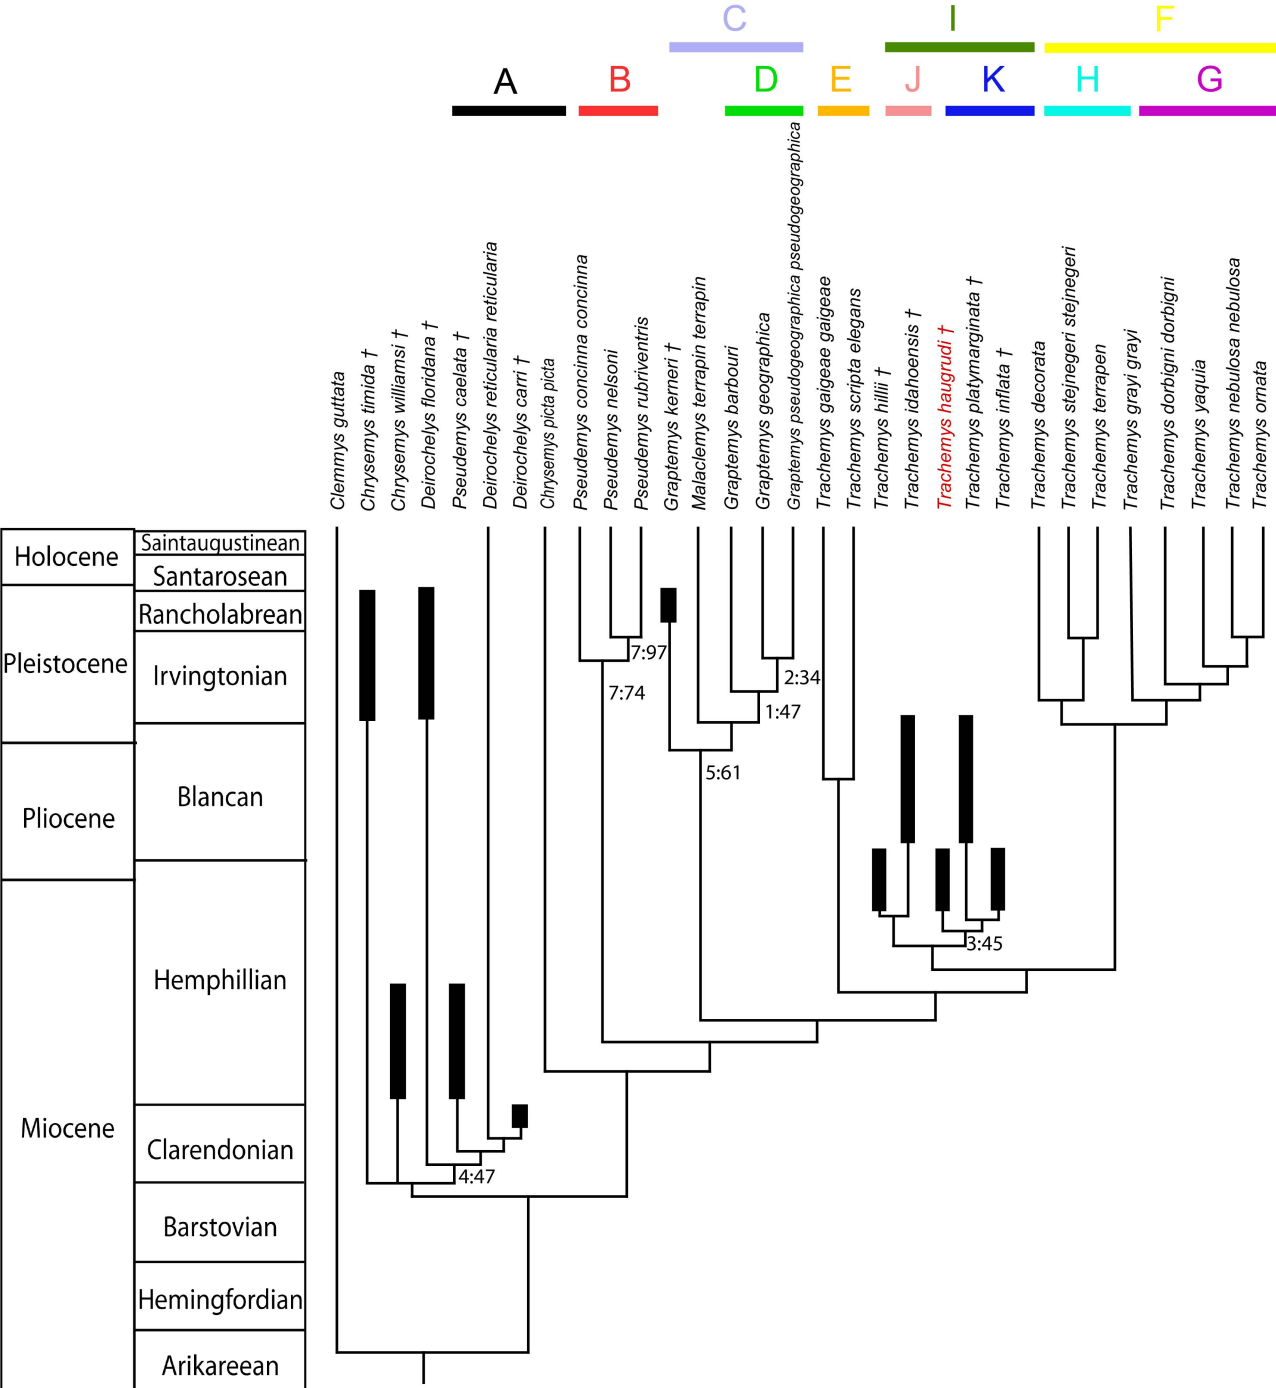

**Figure S74. 50% majority rule consensus tree of the phylogenetic relationships of deirochelyine emydids, with constraints on modern genera, supported by this study based on morphologic data.**
